# Supplementary material for: Cognitive Processes and Resting-State Functional Neuroimaging Findings in High Schizotypal Individuals and Schizotypal Personality Disorder Patients: A Systematic Review
Source: MDPI journal article supplement (doi:10.3390/brainsci13040615), 2023-04-04
Supplement: s1 [file s1]

**Table S1.**Quality assessment of studies with the Newcastle-Ottawa Scale adapted for cross-sectional studies.

| Study                     | Selection Domain                        |             |                         | Comparability Domain                    |                                                                         |                                       | Outcome Domain                   |                      | Total quality score |
|---------------------------|-----------------------------------------|-------------|-------------------------|-----------------------------------------|-------------------------------------------------------------------------|---------------------------------------|----------------------------------|----------------------|---------------------|
|                           | Representative<br>ness of the<br>sample | Sample size | Non-<br>respond<br>ents | Ascertain<br>ment of<br>the<br>exposure | Most<br>importan<br>t<br>Confoun<br>ding<br>factor is<br>controlle<br>d | Additional<br>factor is<br>controlled | Assessmen<br>t of the<br>outcome | Statistic<br>al test |                     |
| Corlett & Fletcher (2012) | 1                                       | 1           | 0                       | 2                                       | 1                                                                       | 0                                     | 2                                | 1                    | 8/10                |
| Ettinger et al. (2013)    | 1                                       | 1           | 1                       | 2                                       | 1                                                                       | 0                                     | 2                                | 1                    | 9/10                |
| Fink et al. (2014)        | 0                                       | 1           | 1                       | 2                                       | 1                                                                       | 1                                     | 2                                | 1                    | 9/10                |
| Hooker et al. (2014)      | 1                                       | 1           | 0                       | 2                                       | 1                                                                       | 1                                     | 2                                | 1                    | 9/10                |
| Huang et al. (2013)       | 0                                       | 1           | 0                       | 2                                       | 1                                                                       | 1                                     | 2                                | 1                    | 8/10                |
| Modinos et al. (2010)     | 0                                       | 1           | 0                       | 2                                       | 1                                                                       | 1                                     | 2                                | 1                    | 8/10                |
| Modinos et al. (2017)     | 1                                       | 1           | 1                       | 2                                       | 1                                                                       | 1                                     | 2                                | 1                    | 10/10               |
| Mohanty et al. (2005)     | 0                                       | 1           | 1                       | 2                                       | 1                                                                       | 0                                     | 2                                | 1                    | 8/10                |
| Olano et al. (2020)       | 0                                       | 1           | 0                       | 2                                       | 1                                                                       | 0                                     | 2                                | 1                    | 7/10                |
| Park et al. (2015)        | 0                                       | 1           | 0                       | 2                                       | 1                                                                       | 0                                     | 2                                | 1                    | 7/10                |
| Rapp et al. (2010)        | 1                                       | 0           | 0                       | 2                                       | 1                                                                       | 0                                     | 2                                | 1                    | 7/10                |
| Schmidt et al. (2019)     | 0                                       | 1           | 0                       | 2                                       | 1                                                                       | 0                                     | 2                                | 1                    | 7/10                |
| Wang et al. (2014)        | 0                                       | 1           | 1                       | 2                                       | 1                                                                       | 1                                     | 2                                | 1                    | 9/10                |
| Wang et al. (2015)        | 0                                       | 1           | 0                       | 2                                       | 1                                                                       | 1                                     | 2                                | 1                    | 8/10                |

| Study                       | Selection Domain                 |             |                 | Comparability Domain          |                                                 |                                 | Outcome Domain            |                  | Total quality score |
|-----------------------------|----------------------------------|-------------|-----------------|-------------------------------|-------------------------------------------------|---------------------------------|---------------------------|------------------|---------------------|
|                             | Representativeness of the sample | Sample size | Non-respondents | Ascertainment of the exposure | Most important Confounding factor is controlled | Additional factor is controlled | Assessment of the outcome | Statistical test |                     |
| Wang et al. (2018)          | 0                                | 1           | 1               | 2                             | 1                                               | 1                               | 2                         | 1                | 9/10                |
| Yan et al. (2016)           | 0                                | 1           | 0               | 2                             | 1                                               | 1                               | 2                         | 1                | 8/10                |
| Yan et al. (2020)           | 0                                | 1           | 1               | 2                             | 1                                               | 0                               | 2                         | 1                | 8/10                |
| Chan et al. (2016)          | 1                                | 0           | 0               | 2                             | 1                                               | 1                               | 2                         | 1                | 8/10                |
| Van der Meer et al. (2013)  | 0                                | 1           | 1               | 2                             | 1                                               | 1                               | 2                         | 1                | 9/10                |
| Harvey et al. (2007)        | 0                                | 1           | 0               | 2                             | 1                                               | 0                               | 2                         | 1                | 7/10                |
| Harvey et al. (2010)        | 1                                | 1           | 0               | 2                             | 1                                               | 1                               | 2                         | 1                | 9/10                |
| Germine et al. (2011)       | 1                                | 1           | 0               | 2                             | 1                                               | 1                               | 2                         | 1                | 9/10                |
| Günther et al. (2017)       | 1                                | 1           | 1               | 2                             | 1                                               | 1                               | 2                         | 1                | 10/10               |
| Yin et al. (2015)           | 1                                | 1           | 0               | 2                             | 1                                               | 1                               | 2                         | 1                | 9/10                |
| Papanastasiou et al. (2018) | 0                                | 1           | 0               | 2                             | 1                                               | 1                               | 2                         | 1                | 8/10                |
| Simon et al. (2015)         | 1                                | 1           | 0               | 2                             | 1                                               | 1                               | 2                         | 1                | 9/10                |
|                             |                                  |             |                 |                               |                                                 |                                 |                           |                  |                     |
| Kozhuharova et al. (2021)   | 0                                | 1           | 1               | 2                             | 1                                               | 1                               | 2                         | 1                | 9/10                |
| Waltmann et al. (2019)      | 1                                | 1           | 1               | 2                             | 1                                               | 1                               | 2                         | 1                | 10/10               |



| Study                    | Selection Domain                        |             |                         | Comparability Domain                    |                                                                         |                                       | Outcome Domain                   |                      | Total quality score |
|--------------------------|-----------------------------------------|-------------|-------------------------|-----------------------------------------|-------------------------------------------------------------------------|---------------------------------------|----------------------------------|----------------------|---------------------|
|                          | Representative<br>ness of the<br>sample | Sample size | Non-<br>respond<br>ents | Ascertain<br>ment of<br>the<br>exposure | Most<br>importan<br>t<br>Confoun<br>ding<br>factor is<br>controlle<br>d | Additional<br>factor is<br>controlled | Assessmen<br>t of the<br>outcome | Statistic<br>al test |                     |
| Dickey et al., 2010      | 1                                       | 1           | 0                       | 2                                       | 1                                                                       | 1                                     | 2                                | 1                    | 9/10                |
| Koenigsberg et al., 2005 | 0                                       | 0           | 1                       | 2                                       | 1                                                                       | 1                                     | 2                                | 1                    | 8/10                |
| Stanfield et al., 2017   | 0                                       | 1           | 0                       | 2                                       | 1                                                                       | 1                                     | 2                                | 1                    | 8/10                |
| Vu et al., 2013          | 1                                       | 1           | 0                       | 2                                       | 1                                                                       | 1                                     | 2                                | 1                    | 9/10                |
| Hazlett et al., 2012     | 0                                       | 1           | 0                       | 2                                       | 1                                                                       | 1                                     | 2                                | 1                    | 8/10                |
|                          |                                         |             |                         |                                         |                                                                         |                                       |                                  |                      |                     |
| Szeszko et al., 2022     | 1                                       | 1           | 1                       | 2                                       | 1                                                                       | 1                                     | 2                                | 1                    | 10/10               |
| Zhang et al., 2014       | 0                                       | 1           | 0                       | 2                                       | 1                                                                       | 0                                     | 2                                | 1                    | 7/10                |
| Zhu et al., 2017         | 0                                       | 1           | 1                       | 2                                       | 1                                                                       | 1                                     | 2                                | 1                    | 9/10                |
